# Cooperative action of Sox9, Snail2 and PKA signaling in early neural crest development

Daisuke Sakai<sup>1</sup>, Takashi Suzuki<sup>1</sup>, Noriko Osumi<sup>1</sup> and Yoshio Wakamatsu<sup>2,\*</sup>

In neural crest formation, transcription factors, such as group E *Sox* and *Snail1/Snail2 (Slug)* regulate subsequent epithelial-mesenchymal transition (EMT) and migration. In particular, *Sox9* has a strong effect on neural crest formation, EMT and differentiation of crest-derived cartilages in the cranium. It remains unclear, however, how *Sox9* functions in these events, and how *Sox9* activity is regulated. In this study, our gain-of-function and loss-of-function experiments reveal that *Sox9* is essential for BMP signal-mediated induction of *Snail2* and subsequent EMT in avian neural crest. We also show that *Snail2* activates the *Snail2* promoter, although *Snail* family proteins have been known as a repressor. Consistently, *Sox9* directly activates the *Snail2* promoter in synergy with, and through a direct binding to, *Snail2*. Finally, functions of these transcription factors in neural crest cells are enhanced by PKA signaling.

**KEY WORDS:** Neural crest, *Sox9*, *Slug*, *Snail2*, PKA, BMP, EMT, Quail

## INTRODUCTION

Neural crest is formed at the boundary of neural plate and non-neural ectoderm in vertebrate embryos, and crest-derived cells subsequently migrate to give rise to various tissues, including neurons, glial cells, melanocytes and cranial mesenchymal tissues (Le Douarin and Kalcheim, 1999). The first sign of neural crest formation is expression of a set of transcription factors in the neural fold, followed by epithelial-mesenchymal transition (EMT) (for reviews, see Meulemans and Bronner-Fraser, 2004; Sakai and Wakamatsu, 2005; Kalcheim and Burstein-Cohen, 2005).

Bone morphogenetic protein (BMP) signaling is important for the neural crest induction. For example, BMP2/4/7 can induce neural crest markers, such as *Snail2* (previously known as *Slug*) and HNK-1 in neural plate explants (Liem et al., 1995; Liem et al., 1997; Liu and Jessell, 1998; Marchant et al., 1998; García-Castro et al., 2002; Wakamatsu et al., 2004a) and the BMP signal is required for the crest induction in head neural folds of avian embryos (Endo et al., 2002). Recently, we showed that Notch signaling regulates *Bmp4* expression and thereby crest formation (Endo et al., 2002; Endo et al., 2003), but other signals, such as Wnt, FGF and retinoids also appear to be involved in neural crest formation in various vertebrate species (LaBonne and Bronner-Fraser, 1998; García-Castro et al., 2002; Villanueva et al., 2002; Monson-Burq et al., 2003; Bastidas et al., 2004).

Under the influence of inducing signals, expression of crest-specific transcription factors will be promoted to regulate the following events in the crest development. *Snail* and *Snail2* [see Barralho-Gimeno and Nieto (Barralho-Gimeno and Nieto, 2005) for nomenclature] genes, both of which encode Zn-finger-type transcription factors, have been shown to be involved in neural crest formation and subsequent EMT (Nieto et al., 1994; LaBonne and Bronner-Fraser, 2000; del Barrio and Nieto, 2002). Other transcription factor genes, such as *Msx1*, *Foxd3*

and group E *Sox* genes (*Sox8*, *Sox9* and *Sox10*), are also involved in early events of neural crest development (Kos et al., 2001; Sasai et al., 2001; Dottori et al., 2001; Spokony et al., 2002; Cheung and Briscoe, 2003; Honore et al., 2003; Tribulo et al., 2003; Lee et al., 2004; Cheung et al., 2005; McKeown et al., 2005). By contrast, *Sox2*, a member of the group B1 *Sox* genes, is expressed in the neural plate and inhibits neural crest formation and EMT (Wakamatsu et al., 2004a).

Among these transcription factor genes, *Sox9* appears to have a central role in neural crest formation and subsequent EMT. In mice carrying a mutation in *Sox9*, the number of crest cells is severely decreased (Cheung et al., 2005). Both in *Xenopus* and chicken embryos, *Sox9* overexpression promotes an increase of crest-like cells (Spokony et al., 2002; Cheung and Briscoe, 2003; McKeown et al., 2005).

Despite rapid progress in this field to identify genes involved in neural crest development, hierarchical relationship of such genes is largely elusive. In particular, our knowledge on the regulation of crest-specific genes at transcriptional level is extremely limited. In our previous study, we analyzed the regulation of the promoter activity of chick *Snail2*, and revealed that *Snail2* is directly regulated by BMP and Wnt signals (Sakai et al., 2005). In this study, we show: (1) that *Sox9* function is required for BMP-mediated *Snail2* induction and EMT; (2) that *Sox9* directly activates the *Snail2* promoter in synergy through a physical interaction with *Snail2* protein; and (3) that cAMP-dependent protein kinase (PKA) signal facilitates *Snail2* induction and EMT, partly by promoting *Sox9* and *Snail2* function. Our results provide significant steps forward in understanding the regulation of early neural crest development.

## MATERIALS AND METHODS

### Experimental animals

Japanese quail (*Coturnix coturnix japonica*) eggs were obtained from Sendai Jun-ran, Sendai. Embryos were staged according to Hamburger and Hamilton (Hamburger and Hamilton, 1951) (HH stage).

### Expression vectors

The coding sequences of quail *Snail2*, *Sox9* and *PKIβ* were PCR-amplified from oligo (dT)-primed E2 embryo cDNA, and inserted into pYDF30 for N-terminal FLAG-tagging and expression. *Sox9* was also subcloned into pYDF-HA for N-terminal-HA tagging. The zinc-finger domain of *Snail2* cDNA was further PCR amplified, and fused to the activation domain of *VP16* and

<sup>1</sup>Center for Translational and Advanced Animal Research on Human Diseases, Division of Developmental Neuroscience, Graduate School of Medicine, Tohoku University, Sendai, Miyagi 980-8575, Japan. <sup>2</sup>Department of Developmental Neurobiology, Graduate School of Medicine, Tohoku University, Sendai, Miyagi 980-8575, Japan.

\* Author for correspondence (e-mail: wakasama@mail.tains.tohoku.ac.jp)

repression domain of *Engrailed2* (a gift from Dr H. Nakamura) (Matsunaga et al., 2000). To generate a repressor form of *Sox9*, the C-terminal sequence downstream of its HMG-domain was removed, *Engrailed2* repression domain was connected (pyDF30 FLAG-*Sox9-En*), and to facilitate nuclear localization, a nuclear translocation signal taken from pDsRed2-nuc (Clontech) was inserted between *Sox9* and *Engrailed2* sequences (pyDF30-FLAG-*Sox9-En-nuc*). Dominant-negative action of this *Sox9* mutant over wild type was confirmed by a *Luciferase* assay with *Snail2* D0.3 reporter in NIH3T3 cells (not shown). Expression vectors of chicken *Sox10* (Cheng et al., 2000), chicken *Foxd3* (Kos et al., 2001) and mouse *Msx1* were kindly provided by Drs P. Scotting, C. Erickson and K. Tamura, respectively. CA-PKA and *Sox9<sup>mlm2</sup>* were generous gifts from Dr B. de Crombrughe (Huang et al., 2000). pEGFP-N1 was purchased from Clontech.

### In situ hybridization

Whole-mount in situ hybridization was performed as described previously (Wakamatsu and Weston, 1997). Quail *Snail2* cDNA for cRNA probe was described previously (Wakamatsu et al., 2004b). Quail *Sox9* was PCR-amplified from oligo (dT)-primed E2 embryo cDNA. Chicken cDNAs of *Sox10* (Cheng et al., 2000), *Foxd3* (Kos et al., 2001), *Msx1* and *Msx2* were kind gift from Drs P. Scotting, C. Erickson and K. Tamura, respectively.

### Luciferase assay

The upstream sequences of *Snail2* subcloned into pGL3-basic (Amersham-Pharmacia) *Luciferase* assay vector were described previously (Sakai et al., 2005). NIH3T3 cells were transfected with a *Luciferase* reporter and effector plasmid DNAs with LipofectAMINE Plus reagent (Invitrogen). pRL-TK was always co-transfected to normalize for transfection efficiency (Dual-Luciferase Assay System; Promega). Cell lysates were prepared for *Luciferase* activity after 24 hours of culture with PicaGene Dual kit (Toyo Ink). To activate PKA signal, 1 mM of cAMP analog 8-bromo-cAMP (Calbiochem) was added in culture. Activation of the signal was confirmed by the activation of pCRE-*luciferase* reporter (Clontech).

The *Luciferase* reporter constructs were also electroporated to medial neural plate of stage 6 quail embryo and neural plate explants were taken from embryos as described below. pRL-SV40 (Amersham-Pharmacia) was co-electroporated to normalize for electroporation efficiency. Neural plate explants were cultured as described below (see also Wakamatsu et al., 2004a). Cells were collected and *Luciferase* activity was assayed after 20 hours of culture.

### Electro-mobility shift assay (EMSA)

Recombinant GST-Snail2 fusion protein was purified from bacterial lysate carrying pET11GST-*Snail2* expression vector. Sox9 proteins were produced by an in vitro transcription/translation system using TNT T7 Quick Master mix (Promega). The DNA-binding mix contained proteins and <sup>32</sup>P-labeled double-strand oligonucleotide in a binding buffer [10 mM HEPES (pH 7.9), 100 mM NaCl, 1 mM DTT, 5 mM EDTA, 5% glycerol and 150 ng of poly (d(I-C))]. The binding reaction was performed with or without unlabeled competitor DNA, incubated at 30°C for 30 minutes. After incubation, reaction mixtures were subjected to electrophoresis and signals were detected by autoradiography. The nucleotide sequence of the probes and competitors were as follows: E-box2, AACCCCCCTGCAC-CTGACTTGCG; mE-box2, AACCCCCCTGACCGAGACTTGCG; mE-box2(1), GAGCAGAAAACCCAAACCCCCCTG; mE-box2(2), CACCTGACTTGCGGGTATTTACG; mE-box2(3), ACAACCCCTGCACCTGACTTGCG; mE-box2(4), AACCAAACCTGCACCTGACTTGCG; mE-box2(5), AACCCCCAGTCACCTGACTTGCG.

### Co-immunoprecipitation assay

*Sox9* full coding sequence, N-terminal deletion (*Sox9ΔN*, carrying amino acids 253-494) and C-terminal deletion (*Sox9ΔC*, carrying amino acids 1-253) were subcloned into pyDF-HA for N-terminal HA-tagging (Fig. 5A). These constructs were transfected into COS7 cells with LipofectAMINE Plus reagent (Invitrogen). *Snail2* full coding sequence, N-terminal deletion (*Snail2ΔN*, corresponding to amino acids 121-268), and C-terminal deletion (*Snail2ΔC*, corresponding to amino acids 1-121) were subcloned into pET11-GST for N-terminal GST-tagging, and transformed *E. coli* BL21(DE3) strain (Fig. 5A). Recombinant GST-Snail2 proteins were purified from whole cell lysates by B-PER GST Fusion Protein Purification kit (PIERCE).

To detect the interaction of GST-Snail2 fusion proteins and HA-Sox9 proteins, immunoprecipitation was performed using ProFound Mammalian HA-tag IP/Co-IP kit (PIERCE). After 24 hours of culture, COS7 cells transfected with HA-Sox9 constructs were lysed in M-PER buffer (PIERCE) and GST-Snail2 fusion proteins were added into the cell lysate, and incubated for 24 hours at 4°C with gentle agitation. Protein complexes in cell extracts were precipitated with immobilized anti-HA antibody agarose beads (PIERCE). Precipitated complexes were eluted by elution buffer and denatured in SDS sample buffer at 95°C for 5 minutes. Co-precipitated proteins were separated by SDS-PAGE, and detected by western blotting using anti-HA (Roche) and anti-GST (Santa Cruz) antibodies.

### Neural plate explant culture

Cultures of neural plate explants were performed as described previously (Wakamatsu et al., 2004a; Sakai et al., 2005). In brief, intermediate fragments of the neural plate at the level of fore- and midbrain were surgically dissected with a tungsten needle along with underlying mesoderm and endoderm. To remove the mesoderm and the endoderm, the dissected tissues were treated with Pancreatin (Gibco). The isolated neural plates were cultured in F12-based medium containing 3% FCS on fibronectin (Sigma)-coated dishes. N2-supplement (1/100 dilution, Invitrogen) and recombinant human BMP4 (20 ng/ml, R&D systems) were added in culture to induce neural crest formation. To inhibit PKA signal, 1 or 10 μM of H89 (Biomol) was added in culture. To obtain consistent results, more than 15 explants were examined in three independent experiments of each condition.

To knockdown *Sox9* expression in the explants, double-strand RNAs (dsRNA) for quail *Sox9* (sense strand: GGAAAGCGACGAGGACAAA) as well as a mutated control dsRNA (GGATAGCCACGTGCAGAAA) were generated (Takara) and the dsRNAs (10 pM/PBS) were electroporated to stage 6-7 quail embryos, as indicated below.

To compare the level of *Snail2* mRNA expression in the neural plate explants, total RNA was prepared by RNeasy kit (Qiagen) and cDNA was generated with SuperscriptII (Invitrogen). The number of PCR cycles required for a linear amplification of *Snail2* cDNA was determined, and amplified bands of *Snail2* were normalized with those of GAPDH and were semi-quantified with NIHImage software. The primers used were: *Snail2*-F, CTCCTTCCTGGTCAAGAAAC; *Snail2*-R, CTTTCTGAAC-CGCTGTGATC; GAPDH-F, GTGAAAGTCGGAGTCAACGG; GAPDH-R, AGTTGGTGGTGCACGATGCA.

### Whole embryo culture and gene transfer

The whole-embryo culture in combination with electroporation was described previously (Endo et al., 2002; Sakai et al., 2005). In brief, before electroporation, the embryos adhering to collagen-coated membranes were set on a chamber with a 2 mm<sup>2</sup> positive electrode (Unique Medical Imada). A tungsten needle was used as the negative electrode. DNA solution (1.2 μl of 5 μg/μl in PBS containing 0.025% Fast Green) was placed on the right ectoderm of the embryo. The condition of electroporation was 3×7V for 25 ms at 200 ms interval. For misexpression studies, pEGFP-N1 and another expression vector were mixed at 1:1.

### Antibodies and immunological staining

62.1E6 anti-Snail2 (mouse IgG1; DSHB) (Liem et al., 1995) antibody was used as described previously (Wakamatsu et al., 2004a; Sakai et al., 2005). M2 anti-FLAG (mouse IgG1, Sigma), anti-β-galactosidase (rabbit polyclonal, Cappel), anti-HA (rabbit IgG, Roche), anti-phospho-CREB (rabbit IgG, Cell Signaling) and anti-phospho-Sox9 (rabbit IgG, Abcam) antibodies were commercially obtained. Anti-chicken Sox9 was a kind gift from Dr R. Lovell-Badge (Morais da Silva et al., 1996). Fluorochrome-conjugated secondary antibodies were purchased from Jackson. Phalloidin conjugated with Texas Red-X or Oregon Green were obtained from Molecular Probes.

Immunological staining on sections and cultured cells was performed as described previously (Wakamatsu et al., 1993; Wakamatsu et al., 1997). Sections treated with antibodies were also exposed to DAPI (Sigma) to visualize nuclei. Whole-mount detection of phospho-CREB was performed essentially as described (Endo et al., 2002).

## RESULTS

### Comparative analysis of expression of neural crest-specific transcription factors

In previous studies, expression of various transcription factors in the neural crest has been described. However, expression patterns have not been compared systematically, particularly at the cranial level. Because we have documented the expression of *Snail2* in detail at the cranial level of quail embryos (Endo et al., 2002; Wakamatsu et al., 2004a), we sagittally bisected Hamburger-Hamilton (HH) stage 6-9 (Hamburger and Hamilton, 1951) quail embryos, and examined expression of *Snail1*, *Sox9*, *Sox10*, *Foxd3*, *Msx1* and *Msx2* in the left half, and compared it with the expression of *Snail2* in the right half, in whole-mount preparations (Fig. 1, Table 1). We confirmed, as previously shown (Sefton et al., 1998), that no *Snail1* expression was observed in the head neural folds or emigrating crest cells (data not shown). As previously described (Endo et al., 2002), *Snail2* mRNA expression was first detected in the head neural folds around the first somite stage (HH stage 6.5). Although *Sox9* expression was already observed in the midline tissue at HH stage 6, it was not detectable in the neural crest domain until HH stage 6.5, and increased at later developmental stages. *Msx1* expression in the boundary between neural plate and non-neural ectoderm was already observed at HH stage 6, and the expression in the neural fold was continuously observed at later stages. *Msx2* expression in the neural folds was observed later than *Snail2* and *Msx1* expression, and neural fold expression in the fore- to midbrain level was observed only at HH stage 8 (four somite stage) and following stages. *Foxd3* expression in the head neural fold was faintly observed at HH stage 7 (one to two somites), while strong expression was already observed in the anterior-medial neural tissues. *Sox10* expression was barely

detectable at HH stage 8, and strong expression was observed at stage 9 (seven somites) in the cranial neural folds and in delaminated neural crest cells.

### Sox9 expression is required for neural crest formation

As *Sox9* was expressed in the cranial neural folds as early as *Snail2* (Fig. 1), and as previous studies in chick trunk and *Xenopus* head neural folds (Spokony et al., 2002; Cheung and Briscoe, 2003; Cheung et al., 2005; McKeown et al., 2005) showed an involvement of *Sox9* in neural crest formation and subsequent EMT, we focused on the function of *Sox9* in cranial neural crest development in avian embryos.

First, we examined Sox9 protein expression in cultured neural plate explants taken from the fore and midbrain levels. In previous studies, we have shown that a treatment of the explants with BMP4 can effectively induce expression of *Snail2* and subsequent EMT (see Materials and methods, see also Fig. 2A, Fig. 6A) (Wakamatsu et al., 2004a; Sakai et al., 2005). Under these conditions, Sox9 expression was also induced effectively (Fig. 2A), although no Sox9 immunoreactivity was detected in cultures without BMP4 in the medium (Fig. 2A). Next, expression vectors of either *Snail2* or *Sox9* were co-transfected with a *GFP* expression vector into the neural plate explants, and the transfected explants were cultured in the absence of BMP4 (Fig. 2B,C). Although *Snail2* misexpression induced neither Sox9 expression nor EMT (Fig. 2B), strong expression of endogenous *Snail2* was induced by the transfection of *Sox9* (Fig. 2C). *Sox9*-transfected cells dispersed on culture dishes and fibroblastic appearance of actin stress fibers lacking junctional actin bundles indicated a promotion of EMT (Fig. 2C). To study *Sox9* function in vivo, an expression vector of *En*-fusion of *Sox9* (*Sox9-En-nuc*, constitutive

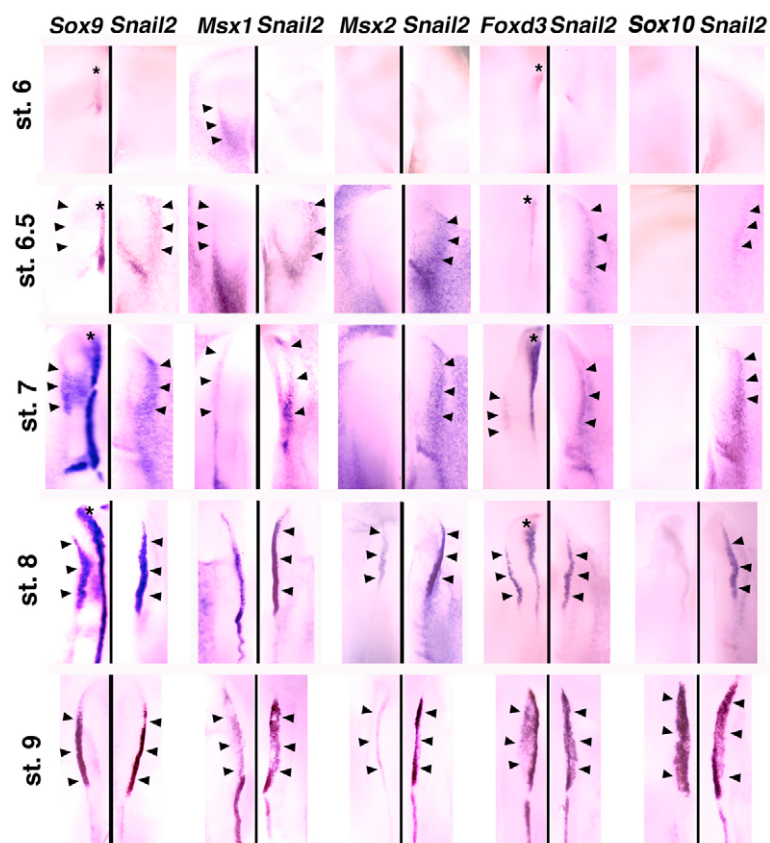

**Fig. 1. Comparative analysis of the expression of transcription factors, such as Sox9, Msx1, Msx2, Foxd3, Sox10 and Snail2, from a dorsal view.** Stage 6-9 embryos were sagittally bisected, and the right halves were hybridized with *Snail2* probe, while the left halves were hybridized with other probes for close comparison. Arrowheads indicate expression in the head neural folds. Asterisks indicate expression of Sox9 and Foxd3 in the midline tissues.



**Table 1. The onset and the level of gene expression in neural fold/neural crest**

|               | HH stage |     |   |    |     |
|---------------|----------|-----|---|----|-----|
|               | 6        | 6.5 | 7 | 8  | 9   |
| <i>Snail2</i> | –        | +   | + | ++ | +++ |
| <i>Sox9</i>   | –        | +   | + | ++ | +++ |
| <i>Msx1</i>   | +        | +   | + | ++ | ++  |
| <i>Msx2</i>   | –        | –   | – | +  | ++  |
| <i>Foxd3</i>  | –        | –   | + | +  | ++  |
| <i>Sox10</i>  | –        | –   | – | –  | +++ |

repressor form) was co-transfected with *GFP* into the ectoderm of cultured quail embryos (see Materials and methods) (see also Endo et al., 2002; Endo et al., 2003; Wakamatsu et al., 2004a; Sakai et al., 2005). Compared with the untransfected side of the neural fold, a clear reduction of *Snail2* mRNA expression was observed (5/6 cases, Fig. 2D). Such downregulation of *Snail2* was never observed when *GFP* was transfected alone (6/6 cases, Fig. 2D). As other group E *Sox* genes, such as *Sox8* and *Sox10*, were expressed in neural crest cells at later stages (Fig. 1) (see also Cheng et al., 2000; Cheung and Briscoe, 2003), transfected *Sox9-En-nuc* might have interfered with the function of *Sox8* and *Sox10* as well. In order to repress the expression of *Sox9* specifically, we performed RNAi-mediated knockdown of *Sox9* by transfecting double-strand RNA (dsRNA, see Materials and methods), which was specific for *Sox9*, into neural plate explants cultured in the presence of BMP4. The transfection of *Sox9* dsRNA inhibited both *Snail2* induction and EMT, otherwise promoted by BMP4 (Fig. 2E). The specificity of the effect of *Sox9* dsRNA was confirmed by the fact that the transfection of mutated dsRNA did not interfere with the promotion of *Snail2* expression and EMT by BMP4, and that co-transfection of the *Sox9* dsRNA and the *Sox9* expression vector could cancel the effect of the *Sox9* dsRNA (Fig. 2E). *Sox10* co-transfection failed to cancel the effect of *Sox9* dsRNA, further showing the specificity of the *Sox9* RNAi (Fig. 2E). These results indicated the requirement of *Sox9* activity in *Snail2* expression and EMT. We thus conclude that *Sox9* is likely to contribute to the expression of *Snail2* and subsequent EMT in the neural crest cells by mediating BMP signal.

### Snail2 auto-activation

In a previous study, we have isolated a promoter sequence of chicken *Snail2* (Sakai et al., 2005). Whereas Smad1, a BMP signal transducer, could directly bind to the *Snail2* promoter sequence and activate the promoter, the promoter lacking Smad-binding sites still responded to the BMP signal to some extent (Sakai et al., 2005). This suggested that BMP signal could also indirectly activate the *Snail2* promoter via other transcription factor(s). In *Xenopus*, exogenous *Snail2* has been shown to induce endogenous *Snail2* expression (LaBonne and Bronner-Fraser, 2000). We thus tested auto-regulation by *Snail2* in the NIH3T3 mouse fibroblast cell line. Transfection of *Snail2* stimulated the *Snail2* promoter-*Luciferase* reporter (D0.1), which contains a conserved E-box motif (see Sakai et al., 2005), in a dose-dependent fashion (Fig. 3A), suggesting that *Snail2* activated its own promoter either directly or indirectly.

As previous studies (Inukai et al., 1999; Hemavathy et al., 2000) have shown that *Snail2* preferentially binds to an E-box-like sequence, and as two E-box have been found in the *Snail2* promoter (Sakai et al., 2005), we reasoned that *Snail2* might directly bind to one of the E-box sequences to activate the promoter. Since D0.1 reporter lacked the E-box1, which was recognized by MyoD (Zhao et al., 2002), we focused on E-box2, which is conserved between *Snail2* orthologs of several species (Sakai et al., 2005). As we anticipated, a direct binding of *Snail2* to the E-box2 was detected by

EMSA (Fig. 3B). Consistently, a reporter carrying a mutation in the E-box2 (Em2) showed little response to *Snail2* expression in a *Luciferase* assay (Fig. 3C).

As *Snail* family proteins have been considered to be repressors (for a review, see Nieto, 2002), and because in *Xenopus*, *Snail2* appears to function as a repressor in crest development (LaBonne and Bronner-Fraser, 2000), our observation that *Snail2* directly activated the *Snail2* promoter appeared paradoxical. However, when 3T3 cells were transfected with an activator form of *Snail2*, *VP16-Snail2*, the D0.1 reporter was strongly activated, while transfection of a repressor form, *En-Snail2*, showed little activation (Fig. 3D). Taken together, these results confirmed the idea that *Snail2* can directly activate its own promoter. This auto-activation alone seemed supportive only for the expression of *Snail2*, as *Snail2* transfection into the neural plate explants increased the expression of endogenous *Snail2* mRNA weakly and transiently (Fig. 3E).

Next, we performed *En-Snail2* transfection into the ectoderm of cultured quail embryo, and this also reduced the expression of endogenous *Snail2* (6/6 cases, Fig. 3F), indicating the requirement of *Snail2* as an activator. It should be emphasized, however, that transfection of *VP16-Snail2* into cultured embryos decreased the endogenous *Snail2* expression (6/6 cases, Fig. 3G), suggesting the requirement of *Snail2* as a repressor. Similarly, transfection of *VP16-Snail2* into neural plate explants inhibited the induction of endogenous *Snail2* expression and EMT by BMP4 added in the culture medium (Fig. 3G). Therefore, *Snail2* could act both as an activator and a repressor, probably dependent on the target genes, and both activator and repressor functions of *Snail2* seemed to be required for neural crest formation and subsequent EMT in avian ectoderm.

### Sox9 synergistically activates the Snail2 promoter

We considered the possible involvement of other transcription factors for *Snail2* activation. As mentioned in the Introduction, both *Foxd3* and *Sox9* have been shown to be involved in neural crest formation both in *Xenopus* and chick (Kos et al., 2001; Sasai et al., 2001; Dottori et al., 2001; Spokony et al., 2002; Cheung and Briscoe, 2003; Cheung et al., 2005; McKeown et al., 2005). In *Xenopus*, *Msx1* and *Sox10* have also been shown to be involved in this process (Tribulo et al., 2003; Honore et al., 2003), and overexpression of *Sox10* induced ectopic EMT in the chick neural tube (McKeown et al., 2005).

Thus, we used the *Luciferase* assay in neural plate explants to test the ability of transcription factors (*Msx1*, *Foxd3*, *Sox9*, and *Sox10*) to activate the D1.2 *Snail2* reporter construct, which contains all the cis-regulatory elements required for the expression in the neural crest (Sakai et al., 2005). We found that only *Sox9* could activate the reporter (Fig. 4A).

To determine if *Sox9* directly bound to the *Snail2* promoter, EMSA was performed (Fig. 4B). A clear binding of *Sox9* was observed when a probe, including the flanking sequence of the E-box2 was used. Competitions with mutated sequences indicated that the C-rich sequence adjacent to the E-box2 was important for the *Sox9* binding (Fig. 4B). Accordingly, a *Snail2* promoter-*Luciferase* reporter containing a mutation in this sequence (Em3) showed little response to *Sox9* expression (Fig. 4C).

Interestingly, although *Sox9* alone could activate the *Snail2* promoter only moderately, co-transfection of *Sox9* and *Snail2* synergistically activated the D0.1 reporter to higher levels (Fig. 4D). The synergistic activation of the *Snail2* promoter by *Sox9* and *Snail2*, and closely located binding sites of these factors in the promoter sequence is consistent with a physical

interaction of these proteins. Co-immunoprecipitation analysis revealed a clear association of Sox9 and Snail2 (Fig. 5). Deletion mutagenesis of both Sox9 and Snail2 showed that their interaction was mediated through the N-terminal Sox9 sequence, including the HMG-box, and the C-terminal Snail2, containing the Zn fingers (Fig. 5).

### Protein kinase A signal enhances Sox9 and Snail2 activity

Although *Sox9* expression could be detected strongly in the premigratory neural crest cells both at the cranial and the trunk levels (see also Cheung and Briscoe, 2003), *Sox9* expression was also detected in more ventral neural tissues of brain and neural tube (see Fig. 1; data not shown). In previous studies, in ovo electroporation

of *Sox9* expression vector into the ventral neural tube did not effectively induce EMT, while co-transfection of *Sox9* and *Snail2* promoted ectopic EMT more efficiently (Cheung and Briscoe, 2003; Cheung et al., 2005) (but see McKeown et al., 2005). We also observed that misexpression of *Bmp4* in vivo expanded *Snail2* expression in the neural fold, but more ventral neural plate cells rarely expressed *Snail2* (Endo et al., 2002). These observations suggested that the activities of these crest factors were spatially modulated by other signals, possibly provided by surrounding tissues in vivo.

As a candidate of signals that modulates *Sox9* function in neural crest formation and EMT, we focused on cAMP-dependent protein kinase A (PKA)-mediated signal, because Sox9 phosphorylation by PKA has been shown to enhance Sox9 function in the transcriptional

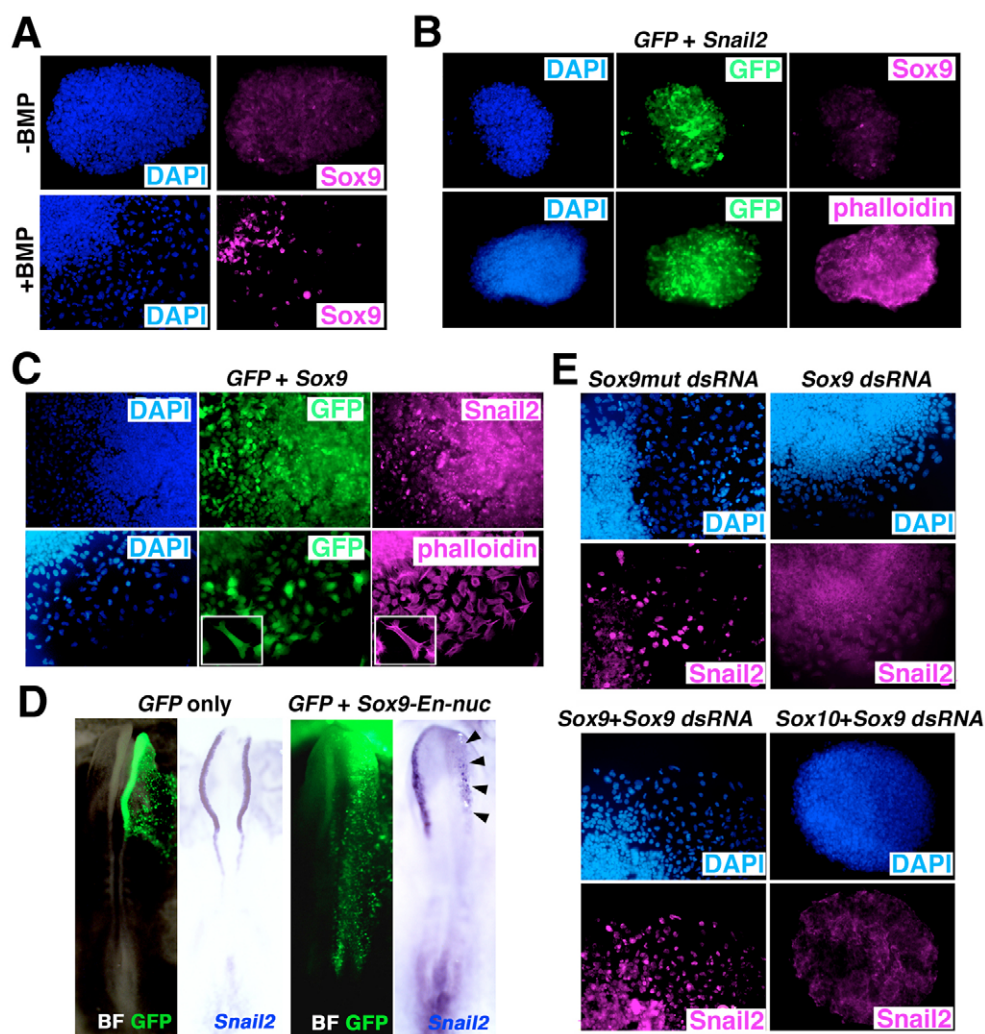

**Fig. 2. Sox9 is required for Snail2 induction downstream of BMP signal.** (A) BMP4 treatment (lower panels) of the neural plate explants effectively induces Sox9 expression and cell dispersal. (B) Neural plate explants were co-transfected with *Snail2* and *GFP* expression vectors, and stained with anti-Sox9 antibody (upper panels) or phalloidin (lower panels). *Snail2* misexpression fails to induce either Sox9 protein expression or epithelial-mesenchymal transition (EMT). (C) Sox9 transfection strongly induces Snail2 expression in neural plate explants and subsequent EMT indicated by an extensive cell dispersal, in the absence of BMP4. Insets indicate higher magnification, showing typical morphology of Sox9-transfected cells. (D) Electroporation of *GFP* and *Sox9-En-nuc* expression constructs was performed on quail embryos at stage 5, and the embryos were cultured for 7 hours. Misexpression of *Sox9-En-nuc* expression vector reduces the *Snail2* mRNA expression (arrowheads), compared with the untransfected side, or a control embryo transfected with *GFP* alone. (E) Sox9 is required for Snail2 induction by BMP4. Neural plate explants, transfected with double-stranded RNA corresponding to Sox9 sequence (*Sox9* dsRNA), show little expression of Snail2 or cell dispersal, in the presence of BMP4. Transfection of mutated dsRNA (*Sox9mut* dsRNA) has no effect (*Sox9+Sox9* dsRNA) and the effect of *Sox9* dsRNA is cancelled by a co-transfection of *Sox9* (*Sox10+Sox9* dsRNA), while co-transfection of *Sox10* fails to cancel the effect of *Sox9* dsRNA.

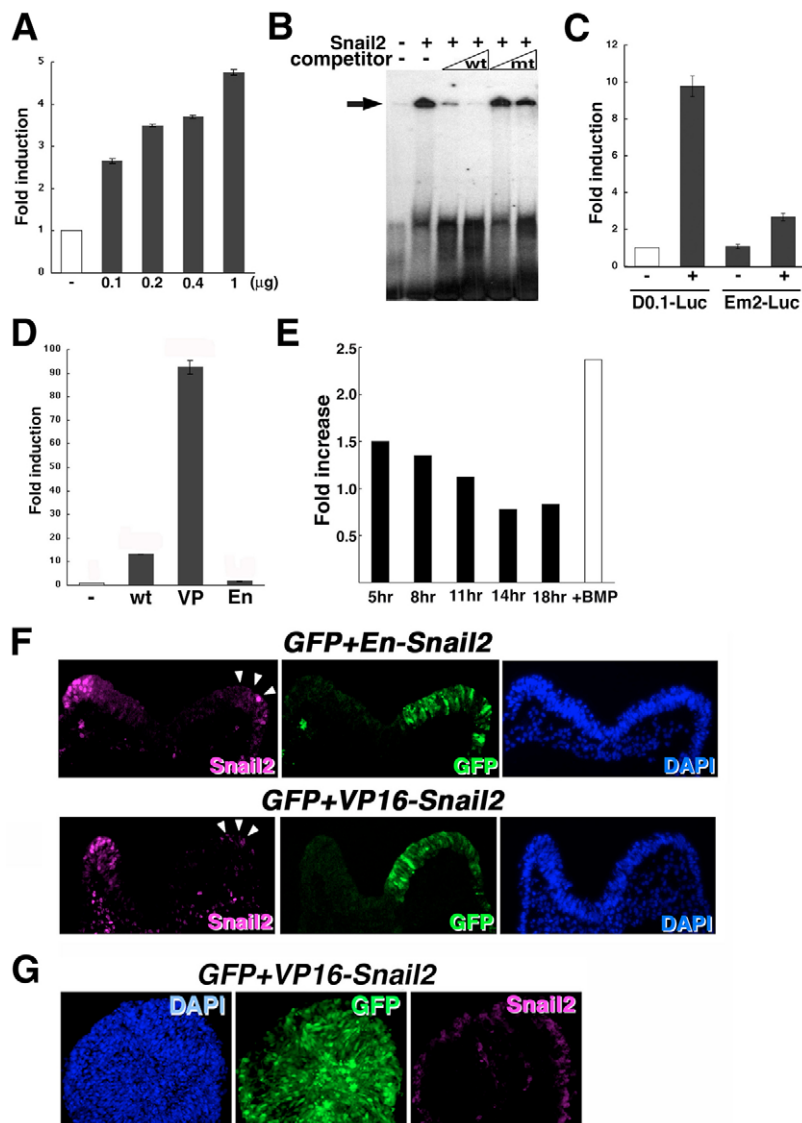

**Fig. 3. *Snail2* activates its own promoter as a transcriptional activator.** (A) A dose-dependent activation of D0.1-*Luciferase* reporter gene by *Snail2* in NIH3T3 cells. Different amounts of *Snail2* expression vector were co-transfected with the *Snail2* promoter-*Luciferase*. (B) *Snail2* protein binds to the E-Box2 sequence. Isotope-labeled probe containing the E-Box2 was incubated with *Snail2* protein, and subjected to EMSA. The shifted band is diminished by a preincubation of the *Snail2* protein with cold wild-type competitor, but persists by a preincubation with E-Box2-mutated competitor. (C) E-box2 is required for the *Snail2* promoter activation by *Snail2*. When E-box2 in the D0.1 reporter is mutated (Em2), activation level of the promoter by *Snail2* (+) is significantly decreased, compared with the wild type. (D) *Snail2* acts as a transcriptional activator on the *Snail2* promoter. An expression vector of VP16 activation domain and *Snail2* zinc-finger motifs (VP) strongly activates the D0.1 promoter, while an expression vector of *Engrailed2* repression domain and *Snail2* zinc-finger fusion (En) has no significant effect on the *Snail2* promoter activity. Wt, wild type *Snail2*. (E) Semi-quantitative RT-PCR analysis of endogenous *Snail2* expression in neural plate explants, transfected with VP16-*Snail2* and cultured without BMP4. Expression level is normalized with the value of amplified GAPDH. Result obtained from explants cultured for 18 hours with BMP4 are also indicated. (F) Transfection of *En-Snail2* and *VP16-Snail2* into ectoderm inhibits the expression of endogenous *Snail2* protein in cultured embryos (arrowheads). GFP-fluorescence indicates the transfected area. Compare with the un-transfected, left neural folds. As the anti-*Snail2* antibody recognizes the N-terminal sequence, it detects only endogenous *Snail2* protein. (G) Transfection of *VP16-Snail2* inhibits the induction of endogenous *Snail2* expression in neural plate explants treated with BMP4.

activation of collagen 2a1 (*Col2a1*) enhancer/promoter in cartilage cells (Huang et al., 2000), and PKA activity appeared to be high in the dorsal neural tube of mouse embryos (Chen et al., 2005). To test the possible role of cAMP/PKA signal on *Sox9* function in neural crest development, we first treated neural plate explants either cultured in the presence of BMP4 or transfected with *Sox9*, with a PKA inhibitor H89 (Chijiwa et al., 1990), which reportedly inhibited emigration of crest cells from neural tube explants (Minichiello et al., 1999). Western blot analysis with anti-phospho-*Sox9* antibody revealed that *Sox9* phosphorylation by PKA was inhibited by H89 in 3T3 cells as expected (data not shown). H89 effectively inhibited the promotion of EMT by BMP4 and *Sox9* in a dose-dependent manner (Fig. 6A,B). However, a high dose of H89 might have inhibited other kinases non-specifically, we also took a different approach. Thus, a mutant version of *Sox9*, in which two PKA-mediated phosphorylation sites were mutated (*Sox9<sup>mlm2</sup>*) (Huang et al., 2000), was transfected into the explants. This construct failed to induce EMT (Fig. 6C), suggesting the PKA-phosphorylation was required in this context. Interestingly, although explants cultured in the presence of BMP4 and H89 failed to express *Snail2* (Fig. 6A), explants transfected with *Sox9<sup>mlm2</sup>*, still expressed *Snail2* (Fig. 6C). Thus, although the PKA activity is required for the induction of

EMT by BMP4/*Sox9*, it seemed not to be essential for the *Snail2* induction by *Sox9*, suggesting multiple sites of action for the PKA signal.

To test the importance of PKA signal for neural crest formation, we next observed the in vivo distribution of phosphorylated CREB protein, which is expressed ubiquitously and is activated by PKA-mediated phosphorylation (for a review, see Shaywitz and Greenberg, 1999). Although phospho-CREB could broadly be observed, slightly higher levels of phosphorylation were observed in the neural folds of stage 7-8 embryos (Fig. 7A,B), at least indicating PKA activity in the corresponding region. Next, to activate the PKA signal in vivo, constitutively active form of PKA (*CA-PKA*) (Huang et al., 2000) was transfected into the ectoderm of cultured quail embryos. This forced activation of PKA signal induced ectopic expression of *Snail2* in the non-neural ectoderm and in the neural plate tissues (Fig. 8A; 6/8). As an opposite experiment, to interfere the PKA function in the neural fold, we transfected an expression vector of *PKIβ*, which encodes a potent PKA inhibitor protein (Van Patten et al., 1992; Scarpetta et al., 1993). The expression of *Snail2* was clearly decreased (Fig. 8B; 7/7), compared with the untransfected, contralateral neural folds, as well as the neural folds transfected



only with *GFP* (6/6). These results both in vivo and in vitro indicated the importance of PKA signal in *Snail2* expression and subsequent EMT.

As described above, some aspect of *Sox9* function could depend on the PKA signal, but the induction of endogenous *Snail2* expression did not appear to rely on the signal (see above). Thus, we tested whether PKA activation could affect the transcriptional activation of the *Snail2* promoter (Fig. 9). Neither addition of cAMP analog in the culture medium nor co-transfection of constitutively-active PKA (*CA-PKA*) significantly increased the Sox9-mediated activation of the *Snail2* promoter. Consistently, mutations in the PKA-phosphorylation sites in Sox9 did not affect the transcriptional activation of the promoter (Fig. 9). Interestingly, the transcriptional activation of the *Snail2* reporter by Snail2 protein was enhanced both

by an addition of cAMP analog and by co-transfection of *CA-PKA* (Fig. 9), although the mechanisms by which PKA signal activates Snail2 function remain to be studied, further suggesting the importance of PKA signal in the early neural crest development.

## DISCUSSION

### Sox9 activates Snail2 expression and neural crest formation

As mentioned above, *Sox9* and other groupE *Sox* genes such as *Sox10* appear to be important for neural crest development (Spokony et al., 2002; Cheung and Briscoe, 2003; Honore et al., 2003; Cheung et al., 2005; Lee et al., 2004; McKeown et al., 2005) (this study). Among those, *Sox9* is expressed earlier than other family members (this study) (see Cheung and Briscoe, 2003; McKeown et al., 2005).

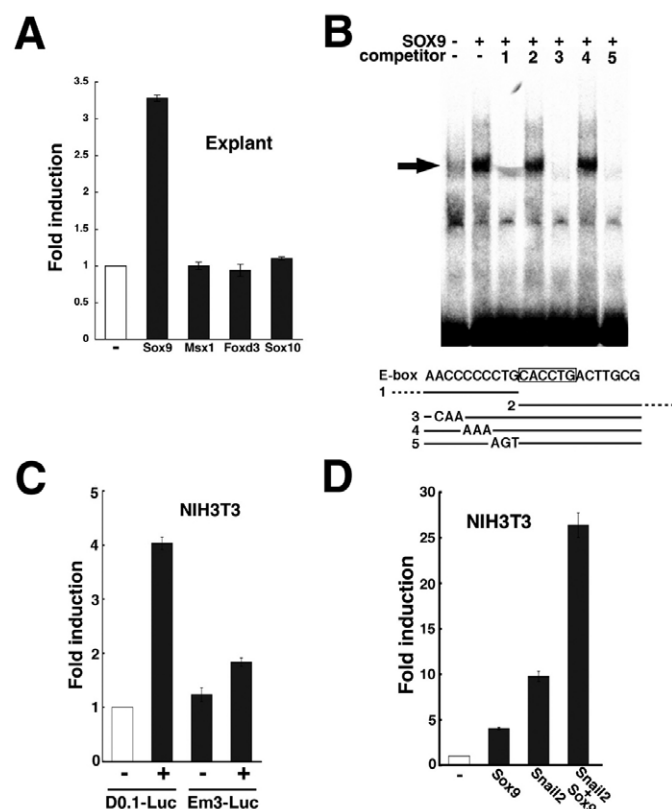

**Fig. 4. Sox9 directly activates *Snail2* promoter.** (A) Activation of *Snail2* promoter by Sox9 in neural plate explants. D1.2-*Luciferase* reporter gene and other 'crest-specific' transcription factors were electroporated into neural plates, and cultured for 20 hours without BMP4. Only Sox9 can activate the reporter. Results are shown as fold-induction compared with the result obtained from explants, transfected with D1.2-*Luciferase* and empty pYDF30 plasmid. (B) Sox9 binds to the flanking sequence of E-box2. EMSA was performed to determine the binding site of Sox9 on *Snail2* promoter. The sequence and the position of the probe and competitors are shown below. E-box2 is indicated by an open box. The Sox9 binding to the E-box probe is interfered by the addition of competitor 1, 3 and 5, but not by competitor 2 or 4. (C) The flanking sequence of E-box2 is required for the *Snail2* promoter activation by Sox9. When the C-rich sequence next to the E-box2 in the D0.1 reporter is mutated (Em3), activation level of the promoter by Sox9 (+) is significantly decreased, compared with the wild-type D0.1. (D) Sox9 and *Snail2* synergistically activate D0.1-*Luciferase* promoter. D0.1-*Luciferase* was co-transfected with Sox9 or *Snail2* (or both) into NIH3T3 cells. Results are shown as a fold-induction compared with the result obtained from cells transfected with D0.1-*Luciferase* and an empty pYDF30.

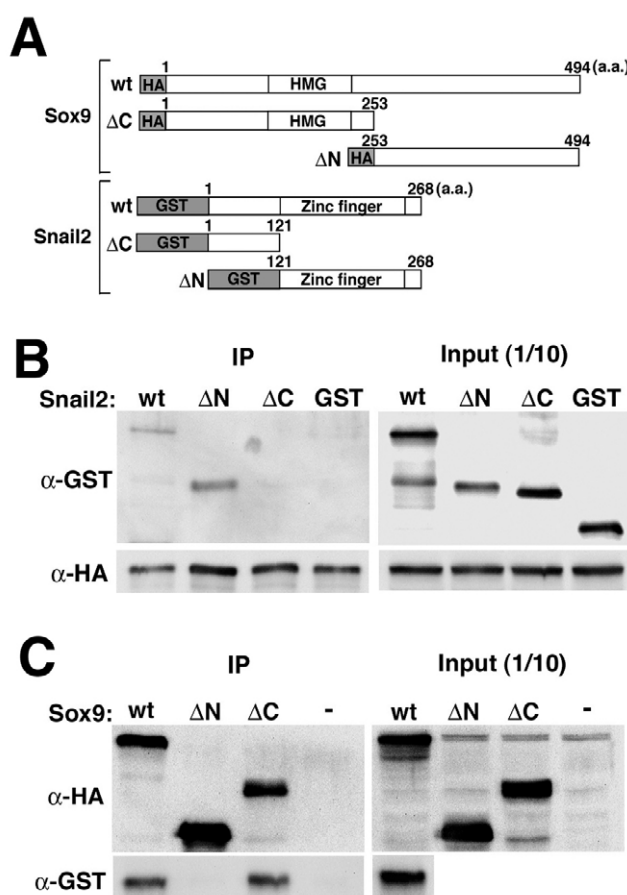

**Fig. 5. Sox9 and Snail2 form a protein complex.** (A) Schematic diagram of wild type (wt) and deletion mutants (ΔC and ΔN) of HA-tagged Sox9 and GST-tagged Snail2. (B) Interaction of GST-Snail2 deletions and full-length HA-Sox9. Extract of HA-Sox9-transfected COS7 cells was incubated with full-length (wt) and deletions of GST-Snail2 (ΔN and ΔC), and immunoprecipitated with anti-HA beads. Full-length and ΔN-Snail2 is detected in precipitated fractions by anti-GST. (C) Interaction of full-length GST-Snail2 and deletions of HA-Sox9. Extracts of COS7 cells transfected with HA-tagged full-length (wt) Sox9 or deletions (ΔN and ΔC) were incubated with GST-Snail2 (ΔN) and immunoprecipitated with anti-HA beads. With anti-GST, precipitation of Snail2 is detected when incubated with extracts containing either full-length Sox9 (wt) or ΔC-Sox9.

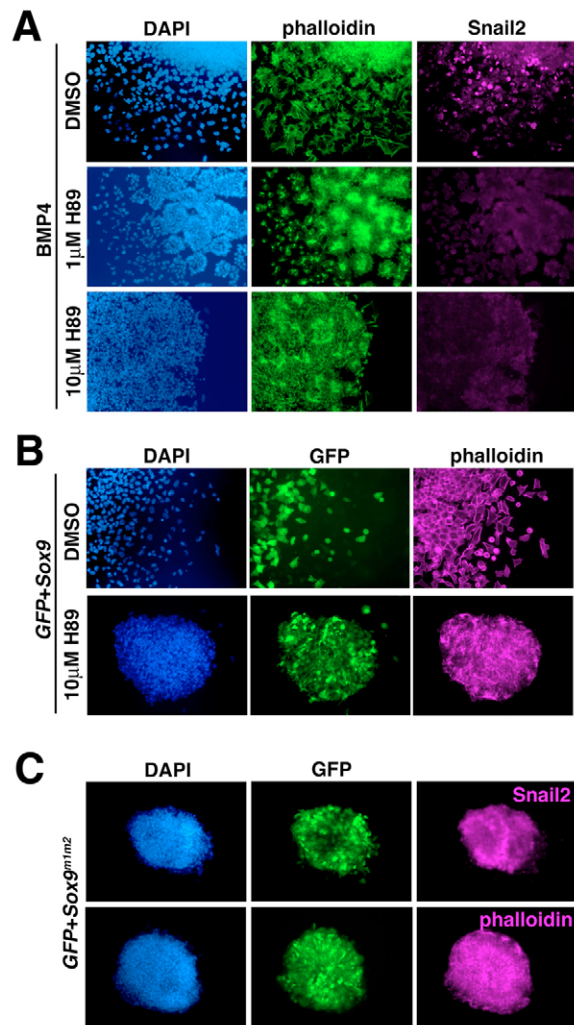

**Fig. 6. PKA signal is required for BMP4 and Sox9 to induce neural crest cells in neural plate explants.** (A) Effects of H89, a PKA inhibitor, on BMP4-mediated induction of neural crest. Neural plate explants were cultured in the presence of BMP4, and F-actin (phalloidin) and Snail2 were examined. Whereas explants treated with a vehicle (DMSO) show extensive EMT and Snail2 expression, treatment with H89 at low (1  $\mu$ M) and high (10  $\mu$ M) concentrations produces partial and nearly complete inhibition of EMT, respectively. Under both conditions, Snail2 induction by BMP4 is blocked. (B) H89 inhibits Sox9-mediated induction of EMT. Although Sox9 transfection strongly induces EMT in neural plate explants, indicated by an extensive cell dispersal in the presence of DMSO, H89 completely blocked EMT. (C) Transfection of Sox9<sup>m1m2</sup>, a PKA-mediated phosphorylation-deficient mutant, induces Snail2 expression, but fails to promote EMT.

In this study, we show that Sox9 directly activates the *Snail2* promoter. Furthermore, we show that Sox9 is a highly potent inducer of *Snail2* expression and EMT in transfected neural plate explants, and that Sox9 function is required for the process. As BMP4 effectively induce Sox9 expression, and as *Snail2* activity is necessary (Nieto et al., 1994) (this study) but not sufficient for EMT (del Barrio and Nieto, 2002) (this study), Sox9 is likely to mediate, at least in part, BMP signal to promote neural crest formation (Fig. 10), while BMP signal also activates Snail2 promoter directly (Fig. 10) (Sakai et al., 2005).

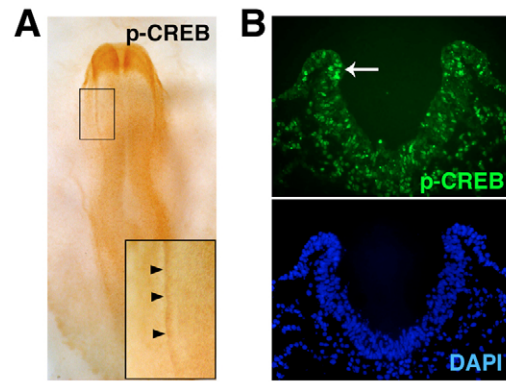

**Fig. 7. Tissue distribution of phospho-CREB in stage 7 embryos.** (A) A whole-mount preparation of anti-phospho-CREB stained embryo. Although anti-phospho-CREB immunoreactivity is broadly observed, stronger and weaker staining can be seen in the neural folds and midline tissue, respectively. The inset indicates a magnified view of boxed area and the neural fold is indicated by arrowheads. (B) Anti-phospho-CREB staining on section. Higher levels of CREB phosphorylation are observed in the prospective neural crest cells in the neural fold (arrow). DAPI staining shows cell nuclei.

How Sox9 promotes neural crest development is largely unknown. Sox9 is expressed in many tissues, and probably regulates distinct sets of genes, depending on the cellular context. For example, Sox9 is involved in cartilage differentiation and directly upregulates *Col2a1* (Lefebvre et al., 1997). Other than *Snail2*, however, there are no crest genes directly regulated by Sox9 known so far. In a previous study, we have shown that Sox2, a group B1 Sox gene, is expressed in the neural plate, and inhibits neural crest formation (Wakamatsu et al., 2004a). Thus, one possible way that Sox9 (and other group E Sox genes) might promote neural crest formation is to interfere with Sox2 function by competing for the binding sites. However, DNA sequences recognized by Sox9 are highly divergent, in contrast to the faithful binding of Sox2 and related group B1 Sox proteins to the Sox consensus binding sequence (Kamachi et al., 1999) (this study). In fact, unlike Sox9, Sox2 does not affect *Snail2* promoter activity, at least in NIH3T3 cells (D.S. and Y.W., unpublished). In any case, it is essential to find more Sox9 targets to further understand the Sox9 function in early neural crest development.

### Snail2 as a transcriptional activator

In this study, we show that Snail2 activates its own promoter by a direct binding to E-box2. To our knowledge, this is the first case of activation of a target gene by Snail family proteins, although a potential transcriptional activation domain has been suggested in artificial assay system (Hemavathy et al., 2000). This inference appears superficially to conflict with previous reports, showing that *Snail2* is involved in a neural crest formation as a transcriptional repressor (LaBonne and Bronner-Fraser, 2000; del Barrio and Nieto, 2002). However, misexpression of *VP16-Snail2* in neural plate explants also activated endogenous *Snail2*. Moreover, consistent with previous reports, *VP16-Snail2* strongly inhibited BMP-induced *Snail2* expression and EMT. Thus, *Snail2* may act as an activator on its own promoter, but it must also act on other target genes as a repressor. The function of Snail2 as an activator probably depends on a partner protein(s), as mutations in the Sox9 binding sequence in the *Snail2* promoter decreased Snail2 mediated activation of the



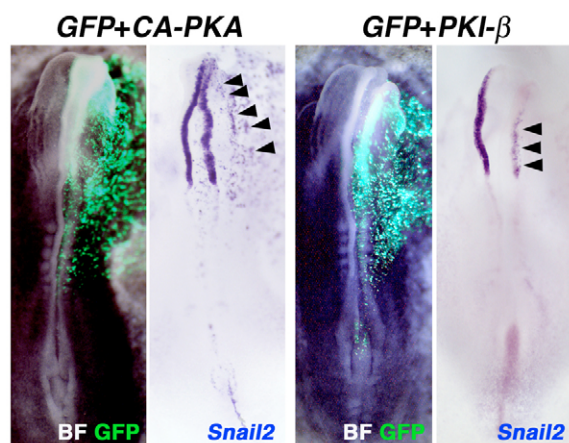

**Fig. 8. PKA signal is important for *Snail2* expression in the neural crest.** Transfection of *CA-PKA* in the ectoderm of cultured embryo induces ectopic *Snail2* expression in neural plate and non-neural ectoderm areas (arrowheads). By contrast, misexpression of *PKIβ* expression vector reduces the *Snail2* mRNA expression, compared with the untransfected side. Electroporation of *GFP* and *CA-PKA* or *PKIβ* expression constructs into the ectoderm was performed on quail embryos at stage 5, and the embryos were cultured for 7 hours.

promoter in 3T3 cells even when Sox9 was not co-transfected (D.S. and Y.W., unpublished). In any case, the next challenge will be to identify target genes and partner proteins of *Snail2* and to study the mechanism by which *Snail2* is converted from a repressor to an activator, or vice versa.

### Cooperative action of *Snail2* and Sox9

Our study revealed that the *Snail2* auto-activation is enhanced by an interaction of *Snail2* and Sox9. Although Sox family protein has been shown to require co-factors for transcriptional activation, the combination of *Snail2* and Sox9 is unique, as reported examples for Sox partner are mostly homeobox-containing proteins, such as Oct3/4, Pax6 and Brn2 (for a review, see Kondoh et al., 2004). Nevertheless, the partnership of Sox9 and *Snail2* is in line with a previous report, showing that co-transfection of *Sox9* and *Snail2* effectively induced ectopic EMT in the neural tube (Cheung et al., 2005). There will probably be more target genes of the Sox9-*Snail2* complex, considering the strong effect of the combination.

### Modulator of neural crest-inducing signals

Although many inducing signals such as BMP and Wnt for neural crest formation have been suggested, there are few reports for inhibitory signals and factors. However, as the initial patterning of the embryonic ectoderm is mediated not only by the inducing signals such as BMP, Wnt and FGF proteins, but also by inhibitory factors such as Noggin, it is likely that similar mechanisms may be involved in the spatially restricted formation of the neural crest. In fact, emerging evidences indicate relatively broad tissue distribution of inducing signal inputs, such as the localization of phospho-Smad1 for BMP signal (Faure et al., 2000; Faure et al., 2002; Sakai et al., 2005), and expression of reporter gene containing Lef/Tcf binding sites for canonical Wnt signal (Sakai et al., 2005), compared with the relatively narrow domain of neural crest marker expression. This can be explained by the level of signal inputs, but such pattern can also be established by the opposing effects of facilitating and inhibitory signals.

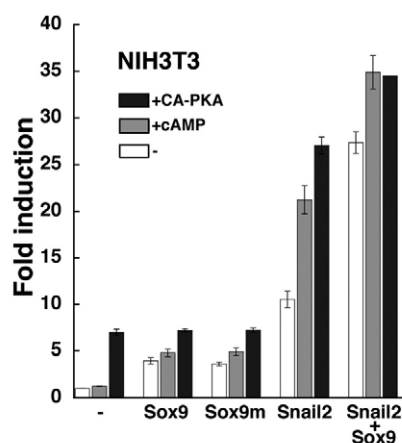

**Fig. 9. Enhancement of *Snail2*-mediated activation of the *Snail2* promoter by PKA signal.** *Sox9*, *Sox9<sup>m1m2</sup>*, *Snail2* or *Sox9+Snail2* were transfected into NIH3T3 cells along with D0.1-*Luciferase* reporter. To activate PKA signal, either 1 mM of 8-bromo-cAMP (+cAMP) was added in culture or constitutively active PKA (*CA-PKA*) was co-transfected. Results are shown as a fold-induction compared with the result obtained from cells transfected with D0.1-*Luciferase* and an empty pyDF30 vector.

In this study, we indicate that the PKA signal facilitates Sox9/*Snail2* function to promote crest formation and EMT (Fig. 10). It remains unclear, however, if spatially regulated PKA signal contributes restricted neural crest formation in the embryonic ectoderm. Based on the distribution of phospho-CREB immunoreactivity, PKA signal activity may be broad in the early avian embryos, thus PKA signal would function as a permissive signal. However, because there is no method available to detect PKA activity directly in vivo, and as transfection of *CA-PKA* ectopically induces *Snail2* expression, spatially restricted PKA activity may still contribute for the patterned induction of the neural crest and EMT. It is worth mentioning that, because the *CA-PKA* transfection did not posteriorly expand the fore- to midbrain domain, which produces robust *Snail2*-positive crest cells compared with more posterior axial level, the ectopic induction of *Snail2* does not appear to be secondary to the axial shift. Although regulator(s) of PKA activity in this context remain(s) elusive at the moment, non-canonical Wnt pathway appears to be one of the candidates, as Wnt signal has been shown to activate PKA signal for the patterning of the somite tissue,

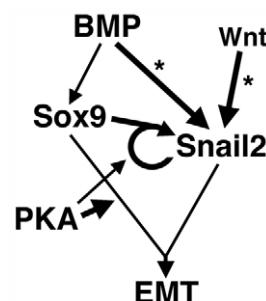

**Fig. 10. Regulatory relationship of signals and transcription factors in avian cranial neural crest formation and EMT.** Thick arrows indicate direct activation. Asterisks indicate direct activation of *Snail2* transcription reported in our previous paper (Sakai et al., 2005).

and the distribution of phospho-CREB indicated high level of PKA activity both in the dorsal somite and dorsal neural tube of mouse embryos (Chen et al., 2005). Consistently, dorsal neural tube and premigratory neural crest cells express various Wnt genes (reviewed by Wu et al., 2003), although the canonical Wnt pathway has been shown to promote EMT of trunk neural crest cells (Burstyn-Cohen et al., 2004).

We thank Drs J. Weston and D. Newgreen for comments on the manuscript. We are grateful to Drs Y. Nakaya, C.-M. Fan and R. Sekido, for technical suggestions and discussions. We thank Drs C. Erickson, R. Lovell-Badge, H. Nakamura, P. Scotting, B. de Crombrughe and K. Tamura for plasmids and antibodies. This work was supported in part by a grant to Y.W. from the Ministry of Education, Science, Sports and Culture, Japan (14034203, 14033205, 14017005, 13138201, 16015214, 16027201, 17024003).

## References

- Barrallo-Gimeno, A. and Nieto, M. A.** (2005). The Snail genes as inducers of cell movement and survival: implications in development and cancer. *Development* **132**, 3151-3161.
- Bastidas, F., De Calisto, J. and Mayor, R.** (2004). Identification of neural crest competence territory: role of Wnt signaling. *Dev. Dyn.* **229**, 109-117.
- Burstyn-Cohen, T., Stanleigh, J., Sela-Donenfeld, D. and Kalcheim, C.** (2004). Canonical Wnt activity regulates neural crest delamination linking BMP/Noggin signalling with G1/S transition. *Development* **131**, 5327-5339.
- Chen, A. E., Ginty, D. D. and Fan, C.-M.** (2005). Protein kinase A signalling via CREB controls myogenesis induced by Wnt proteins. *Nature* **433**, 317-322.
- Cheng, U., Cheung, M., Abu-Elmagd, M. M., Orme, A. and Scotting, P. J.** (2000). Chick *sox10*, a transcription factor expressed in both early neural crest cells and central nervous system. *Brain Res. Dev. Brain Res.* **121**, 233-241.
- Cheung, M. and Briscoe, J.** (2003). Neural crest development is regulated by the transcription factor *Sox9*. *Development* **130**, 5681-5693.
- Cheung, M., Chaboissier, M. C., Mynett, A., Hirst, E., Schedl, A. and Briscoe, J.** (2005). The transcriptional control of trunk neural crest induction, survival, and delamination. *Dev. Cell* **8**, 179-192.
- Chijiwa, T., Mishima, A., Hagiwara, M., Sano, M., Hayashi, K., Inoue, T., Naito, K., Toshioka, T. and Hidaka, H.** (1990). Inhibition of forskolin-induced neurite outgrowth and protein phosphorylation by a newly synthesized selective inhibitor of cyclic AMP-dependent protein kinase, N-[2-(p-bromocinnamylamino)ethyl]-5-isoquinolinesulfonamide (H-89), of PC12D pheochromocytoma cells. *J. Biol. Chem.* **265**, 5267-5272.
- del Barrio, M. G. and Nieto, M. A.** (2002). Overexpression of Snail family members highlights their ability to promote chick neural crest formation. *Development* **129**, 1583-1593.
- Dottori, M., Gross, M. K., Labosky, P. and Goulding, M.** (2001). The winged-helix transcription factor *Foxd3* suppresses interneuron differentiation and promotes neural crest cell fate. *Development* **128**, 4127-4138.
- Endo, Y., Osumi, N. and Wakamatsu, Y.** (2002). Bimodal functions of Notch-mediated signaling are involved in neural crest formation during avian ectoderm development. *Development* **129**, 863-873.
- Endo, Y., Osumi, N. and Wakamatsu, Y.** (2003). *Deltex/Dtx* mediates NOTCH signaling in regulating *Bmp4* expression for cranial neural crest formation during avian development. *Dev. Growth Differ.* **45**, 241-248.
- Faure, S., Lee, M. A., Keller, T., ten Dijke, P. and Whitman, M.** (2000). Endogenous patterns of TGF $\beta$  superfamily signaling during *Xenopus* development. *Development* **127**, 2917-2931.
- Faure, S., de Santa Barbara, P., Roberts, D. J. and Whitman, M.** (2002). Endogenous patterns of BMP signaling during early chick development. *Dev. Biol.* **244**, 44-65.
- García-Castro, M., Marcelle, C. and Bronner-Fraser, M.** (2002). Ectodermal Wnt function as a neural crest inducer. *Science* **297**, 848-851.
- Hamburger, V. and Hamilton, H. L.** (1951). A series of normal stages in the development of the chick embryo. *J. Morphol.* **88**, 49-92.
- Hemavathy, K., Guru, S. C., Harris, J., Chen, J. D. and Tony, I. P. Y.** (2000). Human *Slug* is a repressor that localizes to sites of active transcription. *Mol. Cell. Biol.* **20**, 5087-5095.
- Honore, S. M., Aybar, M. J. and Mayor, R.** (2003). *Sox10* is required for the early development of the prospective neural crest in *Xenopus* embryos. *Dev. Biol.* **260**, 76-96.
- Huang, W., Zhou, X., Lefebvre, V. and de Crombrughe, B.** (2000). Phosphorylation of *SOX9* by cyclic AMP-dependent protein kinase A enhances *SOX9*'s ability to transactivate a *Col2a1* chondrocyte-specific enhancer. *Mol. Cell. Biol.* **20**, 4149-4158.
- Inukai, T., Inoue, A., Kurosawa, H., Goi, K., Shinjyo, T., Ozawa, K., Mao, M., Inaba, T. and Look, A. T.** (1999). *SLUG*, a *ces-1*-related zinc finger transcription factor gene with antiapoptotic activity, is a downstream target of the E2A-HLF oncoprotein. *Mol. Cell* **4**, 343-352.
- Kalcheim, C. and Burstyn-Cohen, T.** (2005). Early stages of neural crest ontogeny: formation and regulation of cell delamination. *Int. J. Dev. Biol.* **49**, 105-116.
- Kamachi, Y., Cheah, K. S. E. and Kondoh, H.** (1999). Mechanism of regulatory target selection by the SOX high-mobility-group domain proteins as revealed by comparison of *SOX12/3* and *SOX9*. *Mol. Cell. Biol.* **19**, 107-120.
- Kondoh, H., Uchikawa, M. and Kamachi, Y.** (2004). Interplay of Pax6 and SOX2 in lens development as a paradigm of genetic switch mechanisms for cell differentiation. *Int. J. Dev. Biol.* **48**, 819-827.
- Kos, R., Reedy, M. V., Johnson, R. L. and Erickson, C. A.** (2001). The winged-helix transcription factor *FoxD3* is important for establishing the neural crest lineage and repressing melanogenesis in avian embryos. *Development* **128**, 1467-1479.
- LaBonne, C. and Bronner-Fraser, M.** (1998). Neural crest induction in *Xenopus*: evidence for a two-signal model. *Development* **125**, 2403-2414.
- LaBonne, C. and Bronner-Fraser, M.** (2000). Snail-related transcriptional repressors are required in *Xenopus* for both the induction of the neural crest and its subsequent migration. *Dev. Biol.* **221**, 195-205.
- Le Douarin, N. M. and Kalcheim, C.** (1999). *The Neural Crest* (2nd edn). Cambridge: Cambridge University Press.
- Lee, Y. H., Aoki, Y., Hong, C. S., Saint-Germain, N., Credidio, C. and Saint-Jeannet, J. P.** (2004). Early requirement of the transcriptional activator *Sox9* for neural crest specification in *Xenopus*. *Dev. Biol.* **275**, 93-103.
- Lefebvre, V., Huang, W., Harley, V. R., Goodfellow, P. N. and de Crombrughe, B.** (1997). *SOX9* is a potent activator of the chondrocyte-specific enhancer of the *pro $\alpha$ 1(I)* collagen gene. *Mol. Cell. Biol.* **17**, 2336-2346.
- Liem, K. F., Jr, Tremml, G., Roelink, H. and Jessell, T. M.** (1995). Dorsal differentiation of neural plate cells induced by BMP-mediated signals from epidermal ectoderm. *Cell* **82**, 969-979.
- Liem, K. F., Jr, Tremml, G. and Jessell, T. M.** (1997). A role for the roof plate and its resident TGF- $\beta$  related proteins in neuronal patterning in the dorsal spinal cord. *Cell* **91**, 127-138.
- Liu, J.-P. and Jessell, T. M.** (1998). A role for *rhob* in the delamination of neural crest cells from the dorsal neural tube. *Development* **125**, 5055-5067.
- Marchant, L., Linker, C., Ruiz, P., Guerrero, N. and Mayor, R.** (1998). The inductive properties of mesoderm suggest that the neural crest cells are specified by a BMP gradient. *Dev. Biol.* **198**, 319-329.
- Matsunaga, E., Araki, I. and Nakamura, H.** (2000). Pax6 defines the di-mesencephalic boundary by repressing *En1* and *Pax2*. *Development* **127**, 2357-2365.
- McKeown, S. J., Lee, V. M., Bronner-Fraser, M., Newgreen, D. F. and Farlie, P. G.** (2005). *Sox10* overexpression induces neural crest-like cells from all dorsoventral levels of the neural tube but inhibits differentiation. *Dev. Dyn.* **233**, 430-444.
- Meulemans, D. and Bronner-Fraser, M.** (2004). Gene-regulatory interactions in neural crest evolution and development. *Dev. Cell* **7**, 291-299.
- Minichiello, J., Ben-Ya'acov, A., Hearn, C. J., Needham, B. and Newgreen, D. F.** (1999). Induction of epithelio-mesenchymal transformation of quail embryonic neural cells by inhibition of atypical protein kinase-C. *Cell Tissue Res.* **295**, 195-206.
- Monson-Burg, A. H., Fletcher, R. B. and Harland, R. M.** (2003). Neural crest induction by paraxial mesoderm in *Xenopus* embryos requires FGF signals. *Development* **130**, 3111-3124.
- Morais da Silva, S., Hacker, A., Harley, V., Goodfellow, P., Swain, A. and Lovell-Badge, R.** (1996). *Sox9* expression during gonadal development implies a conserved role for the gene in testis differentiation in mammals and birds. *Nat. Genet.* **14**, 62-68.
- Nieto, M. A.** (2002). The Snail superfamily of Zinc-finger transcription factors. *Nat. Rev. Mol. Cell. Biol.* **3**, 155-166.
- Nieto, M. A., Sargent, M. G., Wilkinson, D. G. and Cooke, J.** (1994). Control of cell behavior during vertebrate development by *Slug*, a zinc finger gene. *Science* **264**, 835-839.
- Sakai, D. and Wakamatsu, Y.** (2005). Regulatory mechanisms for neural crest formation. *Cells Tissues Organs* **179**, 24-35.
- Sakai, D., Tanaka, Y., Endo, Y., Osumi, N., Okamoto, H. and Wakamatsu, Y.** (2005). Regulation of *Slug* transcription in embryonic ectoderm by beta-catenin-Lef/Tcf and BMP-Smad signaling. *Dev. Growth Differ.* **47**, 471-482.
- Sasai, N., Mizuseki, K. and Sasai, Y.** (2001). Requirement of *FoxD3*-class signaling for neural crest determination in *Xenopus*. *Development* **128**, 2525-2536.
- Scarpetta, M. A. and Uhler, M. D.** (1993). Evidence for two additional isoforms of the endogenous protein kinase inhibitor of cAMP-dependent protein kinase in mouse. *J. Biol. Chem.* **268**, 10927-10931.
- Sefton, M., Sanchez, S. and Nieto, M. A.** (1998). Conserved and divergent roles for members of the Snail family of transcription factors in the chick and mouse embryo. *Development* **125**, 3111-3121.
- Shaywitz, A. and Greenberg, M.** (1999). CREB: a stimulus-induced transcription factor activated by a diverse array of extracellular signals. *Annu. Rev. Biochem.* **68**, 821-861.
- Spokony, R. F., Aoki, Y., Saint-Germain, N., Magner-Fink, E. and Saint-**

- Jeannet, J. P.** (2002). The transcription factor Sox9 is required for cranial neural crest development in *Xenopus*. *Development* **129**, 421-432.
- Tribulo, C., Aybar, M. J., Nguyen, W., Mullins, M. C. and Mayor, R.** (2003). Regulation of Msx genes by a Bmp gradient is essential for neural crest specification. *Development* **130**, 6441-6452.
- Van Patten, S. M., Howard, P., Walsh, D. A. and Maurer, R. A.** (1992). The alpha- and beta-isoforms of the inhibitor protein of the 3',5'-cyclic adenosine monophosphate-dependent protein kinase: characteristics and tissue- and developmental-specific expression. *Mol. Endocrinol.* **6**, 2114-2122.
- Villanueva, S., Galvic, A., Ruiz, P. and Mayor, R.** (2002). Posteriorization by FGF, Wnt, and retinoic acid is required for neural crest induction. *Dev. Biol.* **241**, 289-301.
- Wakamatsu, Y. and Weston, J. A.** (1997). Sequential expression and role of Hu RNA-binding proteins during neurogenesis. *Development* **124**, 3449-3460.
- Wakamatsu, Y., Watanabe, Y., Shimono, A. and Kondoh, H.** (1993). Transition of localization of the N-myc protein from nucleus to cytoplasm in differentiating neurons. *Neuron* **10**, 1-9.
- Wakamatsu, Y., Watanabe, Y., Nakamura, H. and Kondoh, H.** (1997). Regulation of the neural crest cell fate by N-myc: promotion of ventral migration and neuronal differentiation. *Development* **124**, 1953-1962.
- Wakamatsu, Y., Endo, Y., Osumi, N. and Weston, J. A.** (2004a). Multiple roles of SOX2, a HMG-box transcription factor in avian development. *Dev. Dyn.* **229**, 74-86.
- Wakamatsu, Y., Osumi, N. and Weston, J. A.** (2004b). Expression of a novel secreted factor, Seraf indicates an early segregation of Schwann cell precursors from neural crest during avian development. *Dev. Biol.* **268**, 162-173.
- Wu, J., Saint-Jeanett, J. and Klein, P.** (2003). Wnt-frizzled signaling in neural crest formation. *Trends Neurosci.* **26**, 40-45.
- Zhao, P., Iezzi, S., Carver, E., Dressman, D., Gridley, T., Sartorelli, V. and Hoffman, E. P.** (2002). Slug is a novel downstream target of MyoD. Temporal profiling in muscle regeneration. *J. Biol. Chem.* **277**, 30091-30101.
